# Psychiatric Services

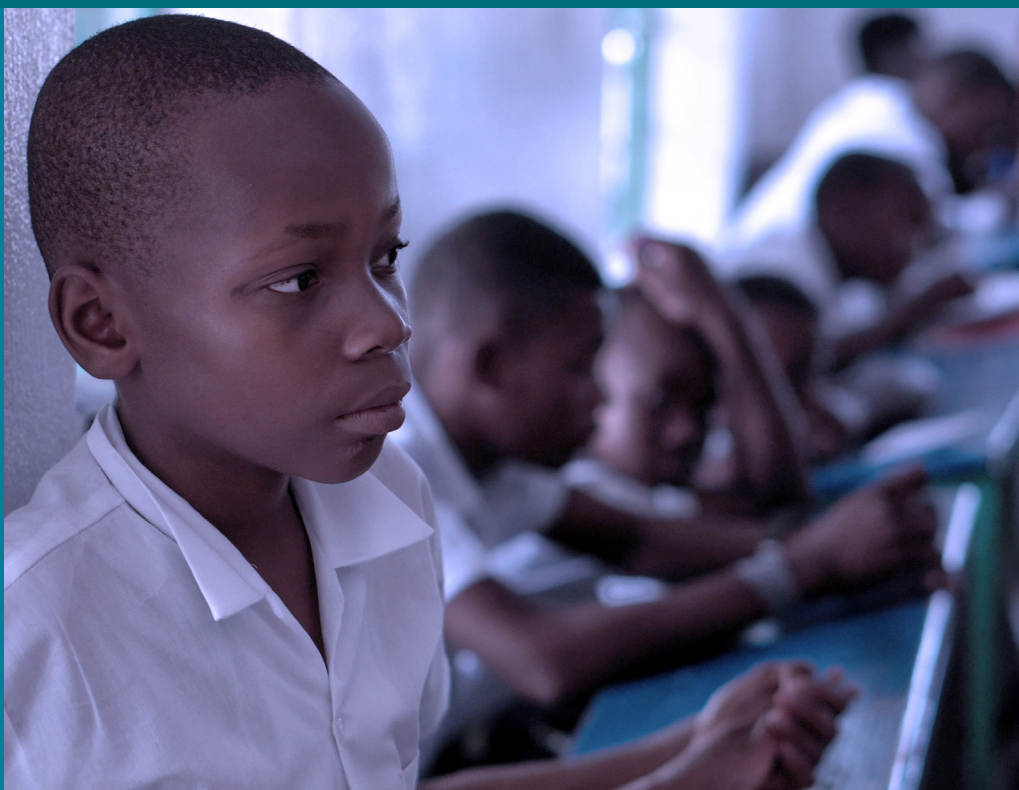

Investing in school mental health programs to help children postlockdown  
Positive views of telepsychiatry among U.S. mental health providers surveyed  
Consensus statement: the path forward for digital mental health treatment  
Using a person-centered approach to understand self-injury

Searching for  
the perfect  
psychiatric  
career?

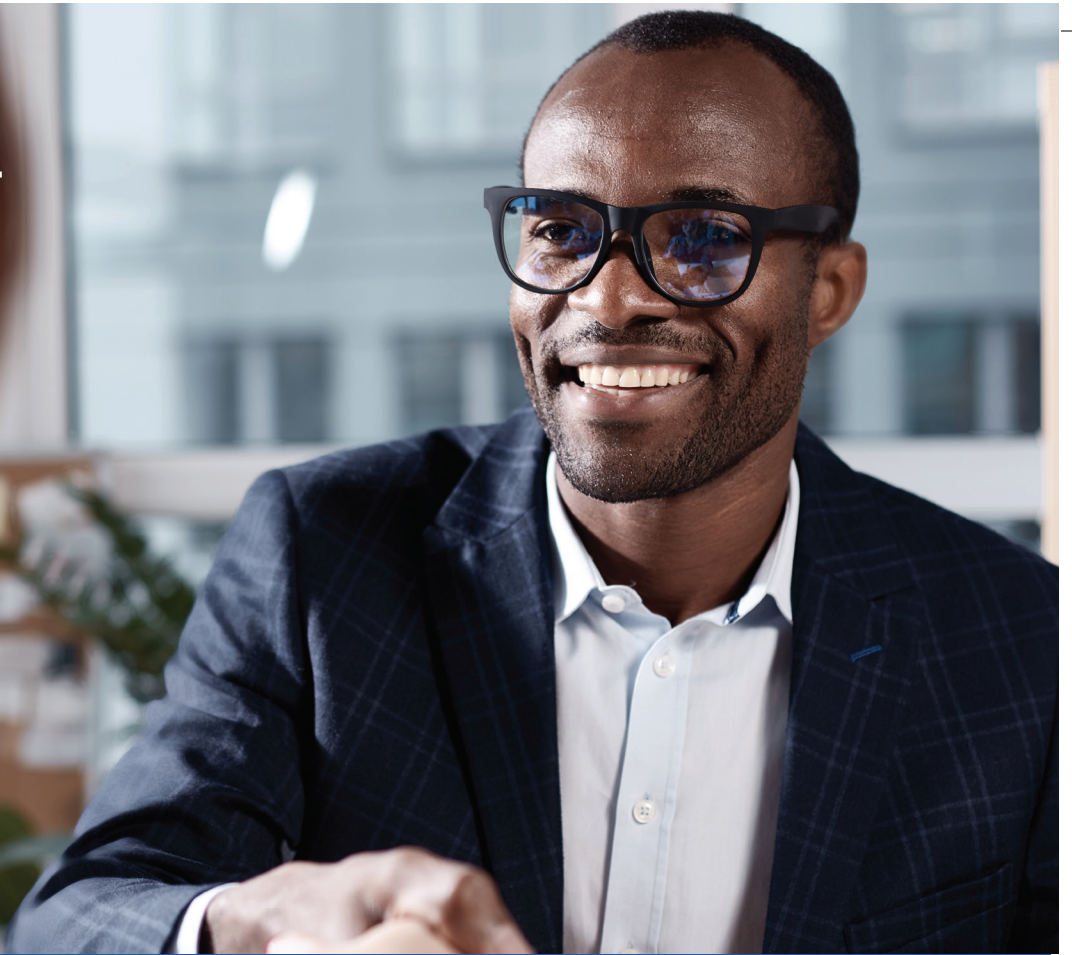

## Let APA JobCentral help!

### Manage Your Career

- Browse hundreds of active job listings!
- Create an account to save jobs, store multiple resumes and cover letters and communicate with employers through our internal messaging system.
- Set up multiple job alerts specifying your skills, interests and location to receive e-mails when employers post jobs that match your criteria.

### Recruit for Open Positions

- Post your job in front of thousands of highly qualified psychiatrists.
- Cross promote your job listing in Psychiatric News.
- Search the anonymous resume database to find your ideal candidate.

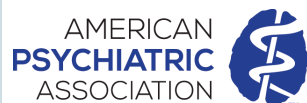

**JOBCENTRAL**  
The Career Hub for Psychiatry

[jobs.psychiatry.org](https://jobs.psychiatry.org)

AH2103A

# APA Publishing Audio Books

## Listen anytime, anywhere

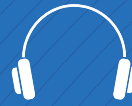

Purchase and listen at [appi.org](http://appi.org)

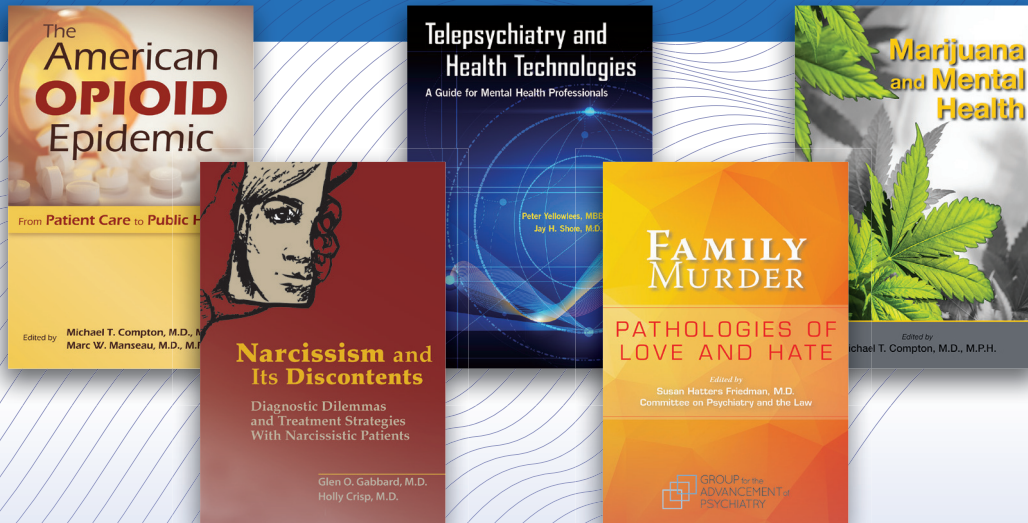

Also available at: Google Podcasts, Apple Podcasts, Spotify, Stitcher, and YouTube

AMERICAN  
PSYCHIATRIC  
ASSOCIATION  
PUBLISHING 

[www.appi.org](http://www.appi.org)  
Email: [appi@psych.org](mailto:appi@psych.org)  
Toll-Free: 1-800-368-5777

## FREE Online Subscription to *Psychiatric Services* for APA Resident-Fellow Members (RFMs)!

American Psychiatric Association Resident-Fellow Members (RFMs) can receive a free online subscription to *Psychiatric Services*.

Visit [ps.psychiatryonline.org](http://ps.psychiatryonline.org) for full-text access to all of the content in this highly ranked, peer-reviewed monthly journal. *Psychiatric Services* focuses on service delivery in organized systems of care, evolving best practices, and federal and state policies that affect the care of people with mental illnesses.

**Please visit [ps.psychiatryonline.org](http://ps.psychiatryonline.org) and log in with your APA username and password.**

Psychiatry residents who are not currently APA Resident-Fellow Members should consider membership in the American Psychiatric Association. The benefits provided to residents are an example of how the APA serves the needs of its members throughout their careers. The low introductory dues APA extends to RFMs are even waived for the first year. Please visit [www.psychiatry.org/join-apa](http://www.psychiatry.org/join-apa) for more information.

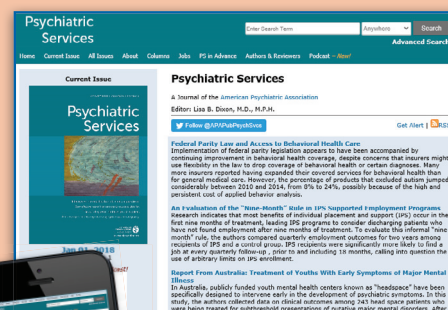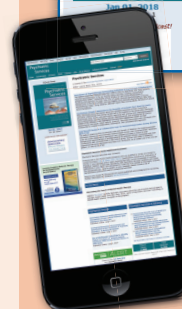

Tune in to our monthly podcast.

**PSYCHIATRIC SERVICES**  
FROM PAGES TO PRACTICE 

AMERICAN  
PSYCHIATRIC  
ASSOCIATION  
PUBLISHING 

Follow @APAPubPsychSvcs 

# See and Hear What the Field Is Discussing!

*Psychiatric Services* features research related to the delivery of mental health services, especially for people with serious mental illness in community-based treatment programs. Provision of high-quality care involves collaboration among a variety of professionals. Clinicians, administrators, and policy makers look to *Psychiatric Services* for research on how to deliver evidence-based treatments, to take an integrated “whole-health” approach to care, and to better engage individuals in their care. Mental health’s current focus on patient-centered, recovery-oriented care and on dissemination of evidence-based practices is transforming service delivery systems at all levels. Research published in *Psychiatric Services* contributes to this transformation.

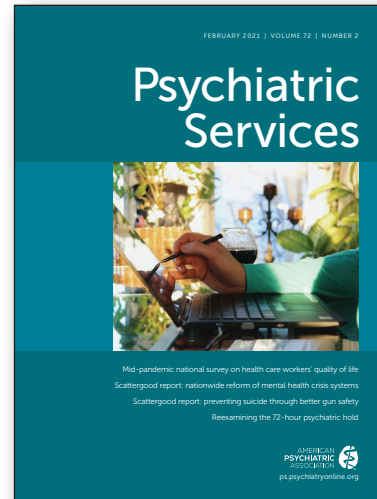

## Our Most Talked About Articles so far in 2021:

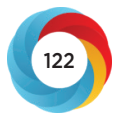

### Banbury Forum Consensus Statement on the Path Forward for Digital Mental Health Treatment

Published online January 20, 2021

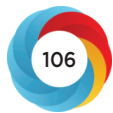

### Health Care Workers' Mental Health and Quality of Life During COVID-19: Results From a Mid-Pandemic, National Survey

February 2021 Issue

## The Discussion Continues: *Psychiatric Services*' Podcast “From Pages to Practice”

Editor Lisa Dixon, M.D., M.P.H., and Podcast Editor and co-host Josh Berezin, M.D., M.S., discuss the latest mental health services research published in *Psychiatric Services* and why it is relevant. Topics include community-based treatment programs, collaborative care, evidence-based treatment and service delivery, criminal and social justice, policy analysis, and more.

### PSYCHIATRIC SERVICES

FROM PAGES TO PRACTICE

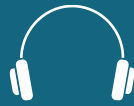

#### December 2020: Oral Health Among Persons With Mental Illness

Wanda G. Wright, D.D.S., M.S.D., discusses barriers and facilitators in addressing the oral health needs of individuals with mental illness from the perspectives of patients, psychiatrists, and dentists.

#### February 2021: Addressing the Gap Between Global Mental Health Research and Treatment

Milton L. Wainberg, M.D., discusses protocols for studies implementing comprehensive mental health services in low- and middle-income countries.

[ps.psychiatryonline.org](https://ps.psychiatryonline.org)

AMERICAN  
PSYCHIATRIC  
ASSOCIATION  
PUBLISHING

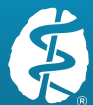

AH2112
