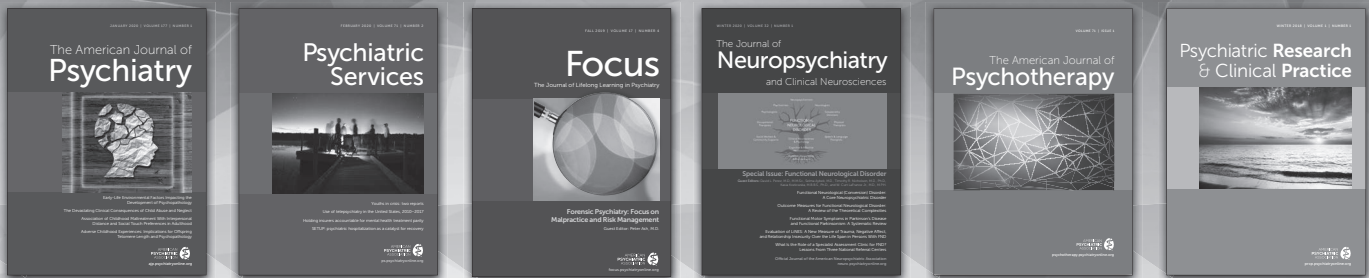

## More Ways to Engage Beyond Reading a Page

The journals of American Psychiatric Association Publishing are leading contributors to the literature. Our articles advance understanding of all aspects of mental and behavioral disorders and their treatment. With close to 10 million page views of journal content annually, APA Publishing's journals reach audiences at more than 2,000 U.S. and international institutions, a figure that includes nearly 100% of U.S. medical schools and hospitals.

APA Publishing is committed to discovery of journal articles and offers several ways to access journal content on the **PsychiatryOnline** knowledge portal, ensuring that practitioners can keep up with the latest findings in the manner they prefer.

### PODCASTS

Each episode brings you an in-depth look at articles featured in that month's issue. Lively discussion and wide-ranging interviews with authors cover the background, rationale, main findings, and future implications of the research.

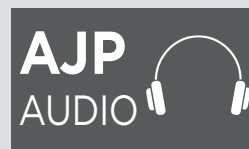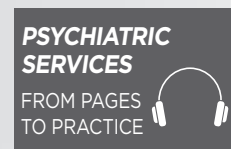

### AUDIO SYNOPSES

Prepared in collaboration with *Psychiatric News*, these audio synopses accompany the online article and can be accessed as a skill through Amazon's Alexa app.

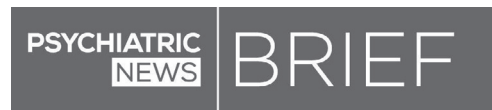

### CURATED COLLECTIONS

These collections of recent and seminal research in a given area can be used as a launch point for authors conducting literature reviews and for educators working on course content. Curated **Editor's Choice** collections from *Psychiatric Services* are currently available.

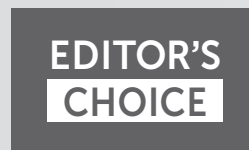

### ALERTS

Keep up with all of the latest research being published by signing up to receive **Publication Alerts** and following on Twitter @APAPubJournals.

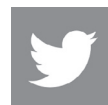

### GET INVOLVED!

We also encourage active contributions to our journals. Submit your research for publication consideration at one of our peer-reviewed titles. Even if you don't have a paper at present, visit our submission site and set up your reviewer account so that you have a say in future contributions to the literature.

[psychiatryonline.org/journals](http://psychiatryonline.org/journals)

Subscribe @ [www.appi.org](http://www.appi.org) • Email: [appi@psych.org](mailto:appi@psych.org) • Toll Free: 1-800-368-5777

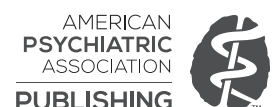

Source: https://psychiatryonline.org/doi/suppl/10.1176/ps.2021.72.issue-6/suppl_file/front.pdf
